# Supplementary material for: Thermally stable inverted perovskite solar cells using an electropolymerized Zn-porphyrin film as a dopant-free hole-transporting layer
Source: Royal Society of Chemistry journal article supplement (doi:10.1039/d2ta09866k), 2023-01-01
Supplement: d2ta09866k1.pdf [file d2ta09866k1.pdf]

## Supporting Information

# Thermally stable inverted perovskite solar cells using electropolymerized Zn-porphyrin film as dopant-free hole-transporting layer

Yangjie Lan,<sup>+ab</sup> Yu-Duan Wang,<sup>+a</sup> Zhong-Rui Lan,<sup>ac</sup> Yang Wang,<sup>a</sup> Bin-Bin Cui,<sup>\*b</sup> Jiang-Yang Shao<sup>\*a</sup> and Yu-Wu Zhong<sup>\*ac</sup>

<sup>a</sup>Beijing National Laboratory for Molecular Sciences, CAS Research/Education Center for Excellence in Molecular Sciences, Institute of Chemistry, Chinese Academy of Sciences, 2 Bei Yi Jie, Zhong Guan Cun, Haidian District, Beijing 100190, China

<sup>b</sup>Advanced Research Institute of Multidisciplinary Science, Beijing Institute of Technology, Beijing 100081, P. R. China.

<sup>c</sup>School of Chemical Sciences, University of Chinese Academy of Sciences, No.19(A) Yuquan Road, Shijingshan District, Beijing 100049, China.

### Corresponding Authors

\*shaojiangyang@iccas.ac.cn (J.-Y.S.)

\*cui-chem@bit.edu.cn (B.-B.C.)

\*zhongyuwu@iccas.ac.cn (Y.-W.Z.);

<sup>+</sup>These authors contribute equally to this work.

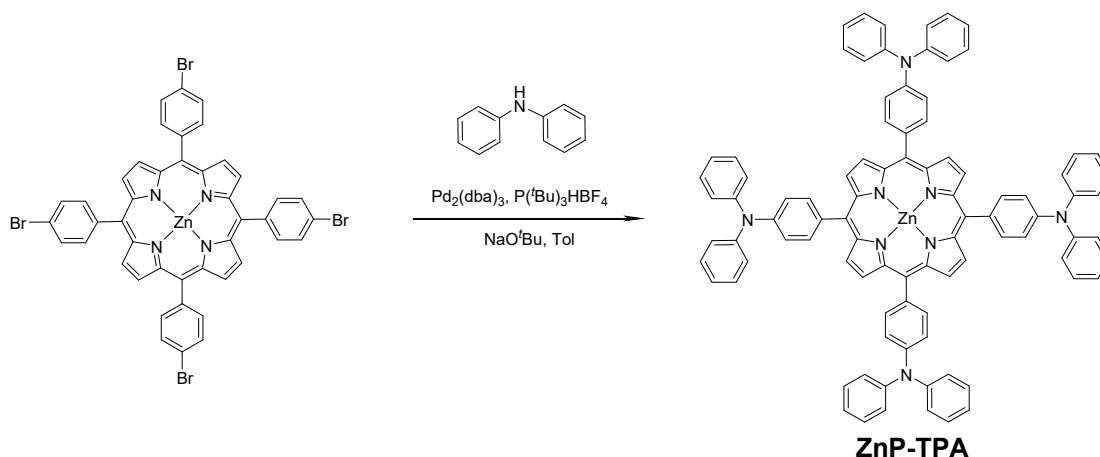

**Fig. S1.** Schematic diagram of the synthesis route of ZnP-TPA

### Synthesis of ZnP-TPA

5,10,15,20-tetra(p-bromophenyl)porphyrin zinc (250.0 mg, 0.25 mmol), diarylamines (212.8 mg, 1.25 mmol), Pd<sub>2</sub>(dba)<sub>3</sub> (23.0 mg, 0.025 mmol), tri-tert-butylphosphine (0.53 ml, 1M) and sodium tert-butoxide (120.8 mg, 1.25 mmol) were dissolved in toluene (20 mL) and stirred at 120 °C with reflux for 36 h under a nitrogen atmosphere. Followed by the addition of proper amount of water, the resulting solution was extracted with CH<sub>2</sub>Cl<sub>2</sub>. The combined organic layer was dried over MgSO<sub>4</sub>. After removing the solvent under reduced pressure, the residue was purified by silica gel chromatography (eluent: petroleum ether/ dichloromethane, 1/1) to yield 257.3 mg of ZnP-TPA in 75.6% yield. <sup>1</sup>H NMR (300 MHz, CDCl<sub>3</sub>): δ 9.10 (s, 8H), 8.06 (d, *J* = 9 Hz, 8H), 7.47-7.37 (m, 40H), 7.13 (m, 8H). MALDI-TOF (*m/z*): calcd for C<sub>92</sub>H<sub>64</sub>N<sub>8</sub>Zn 1346.96, found 1347.73.

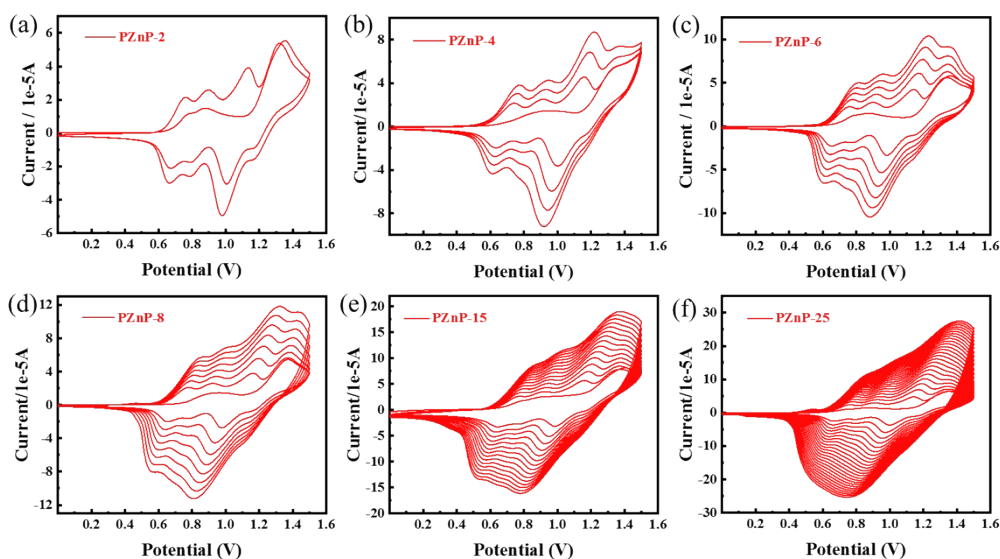

**Fig. S2.** Cyclic voltammograms recorded during the oxidative electropolymerization of ZnP-TPA (0.12 mg/mL in CH<sub>2</sub>Cl<sub>2</sub>) on an indium–tin-oxide (ITO) glass electrode with different scan cycles between 0 and +1.5 V at 100 mV/s.

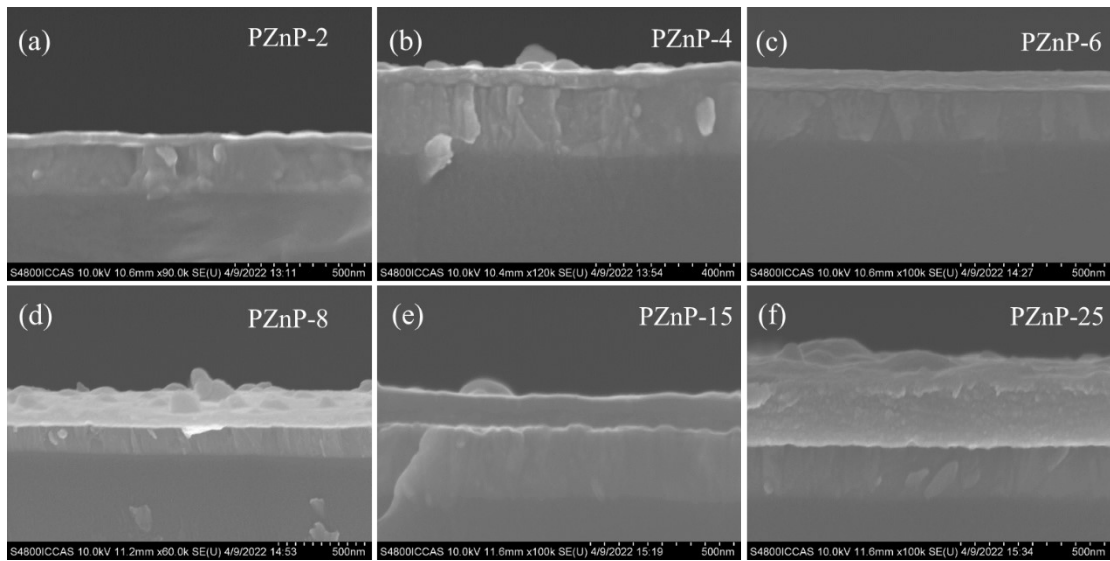

**Fig. S3.** Cross-section SEM picture of ITO/PZnP film obtained after 2, 4, 6, 8, 15 and 25 scan cycles.

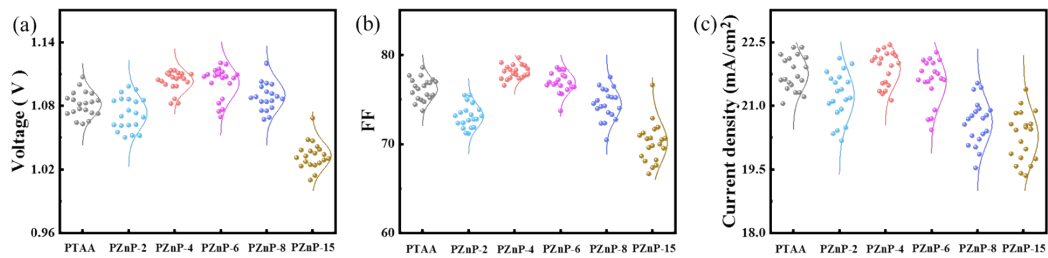

**Fig. S4.** Statistical diagrams of PSCs performance based on electropolymerized PZnP and PTAA, including  $V_{oc}$ , FF, and  $J_{sc}$  (20 devices).

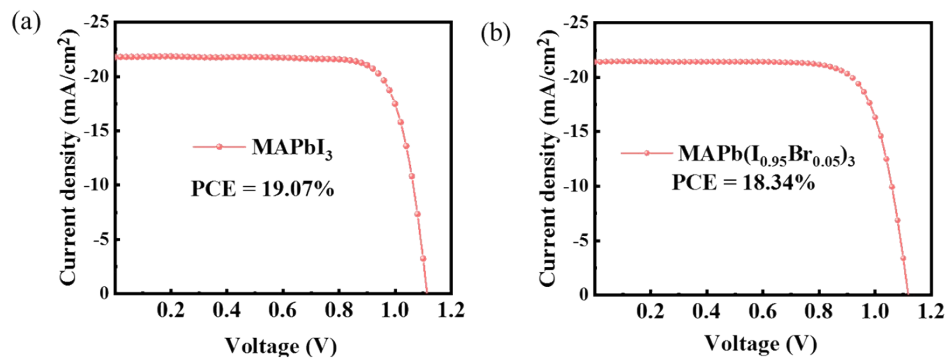

**Fig. S5.**  $J$ - $V$  curves of the best-performance of MAPbI<sub>3</sub> and MAPb(I<sub>0.95</sub>Br<sub>0.05</sub>)<sub>3</sub> perovskite solar cells.

**Table S1** Summary of PZnP-based device parameters with different perovskite materials

| Perovskite                                               | $J_{sc}$ (mA cm <sup>-2</sup> ) | $V_{oc}$ (V) | $FF$ (%) | PCE (%) |
|----------------------------------------------------------|---------------------------------|--------------|----------|---------|
| MAPbI <sub>3</sub>                                       | 21.79                           | 1.11         | 78.53    | 19.07   |
| MAPb(I <sub>0.95</sub> Br <sub>0.05</sub> ) <sub>3</sub> | 21.40                           | 1.12         | 76.68    | 18.34   |

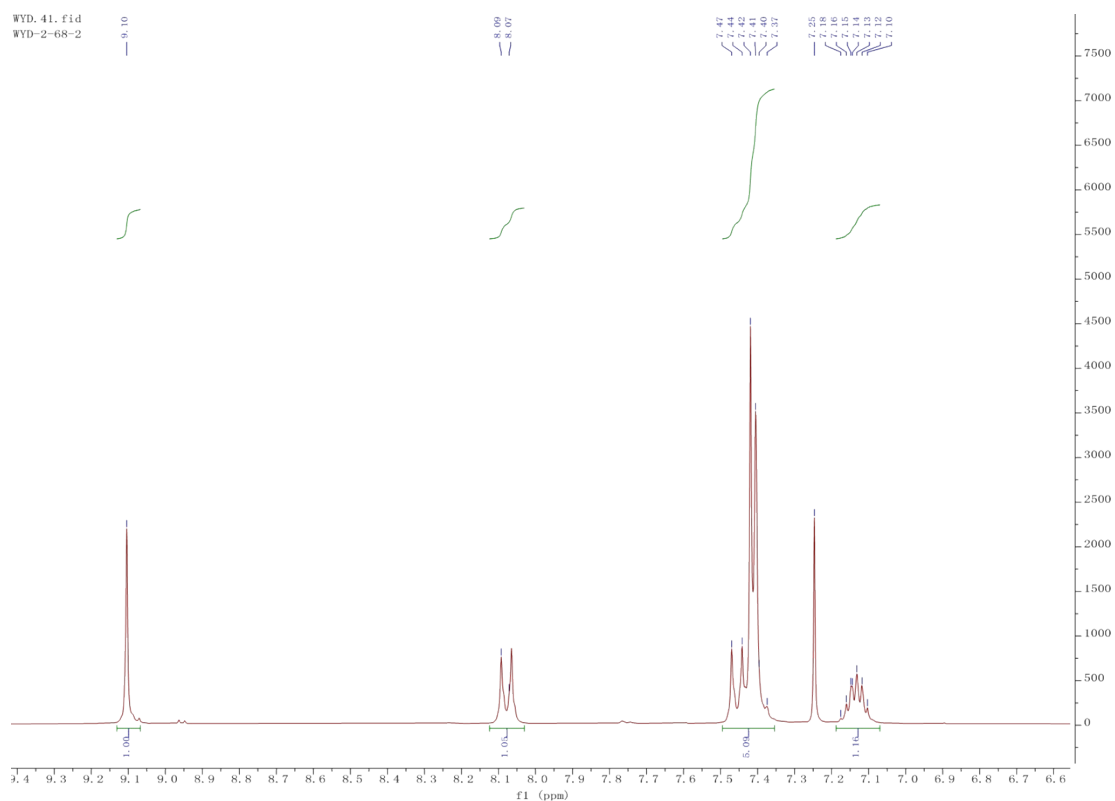

**Fig. S6** <sup>1</sup>H NMR spectrum of ZnP-TPA in CDCl<sub>3</sub>.
